# Supplementary material for: Mental health service diversity and work disability: associations of mental health service system characteristics and mood disorder disability pensioning in Finland
Source: Springer Nature journal article supplement (doi:10.1007/s00127-023-02481-5), 2023-04-28

Online Resource 4. Characteristics of the municipality-level mental health service ESMS-R factors in Finland as boxplot figures.

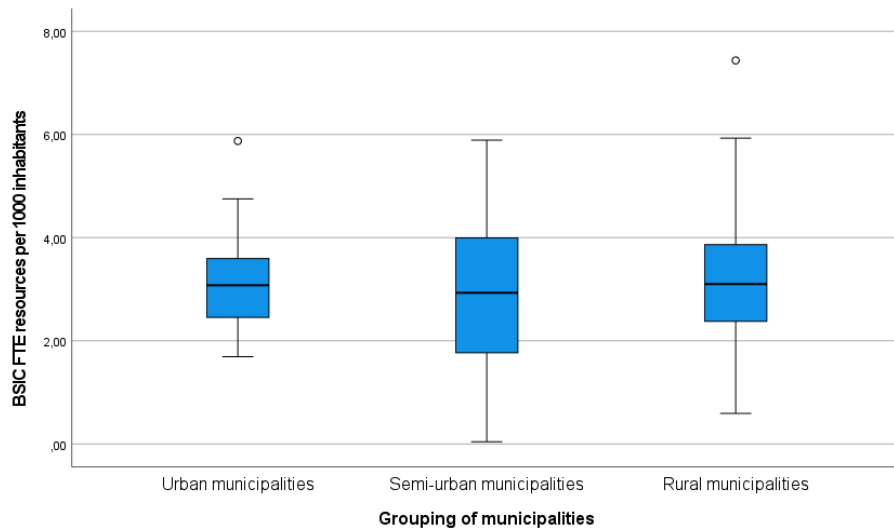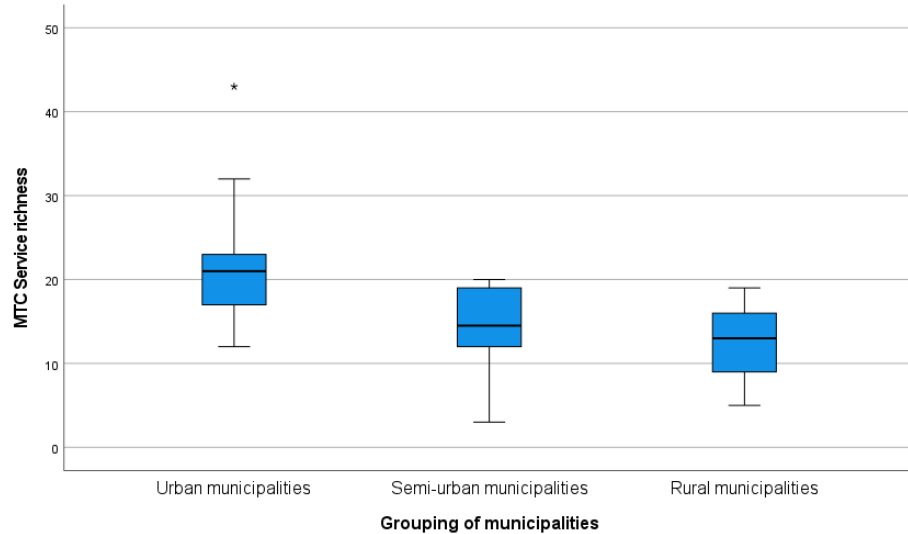

Author information: Mental health service diversity and work disability: associations of mental health service system characteristics and mood disorder disability pensioning in Finland. (2023). *Social Psychiatry and Psychiatric Epidemiology*. Tino Karolaakso [Faculty of Social Sciences (Psychology), Tampere University, Arvo Ylpön katu, 34, 33520 Tampere, Finland; [tino.karolaakso@tuni.fi](mailto:tino.karolaakso@tuni.fi)], Reija Autio, Petra Suontausta. Helena Leppänen, Päivi Rissanen, Turkka Näppilä, Martti T. Tuomisto, Sami Pirkola.

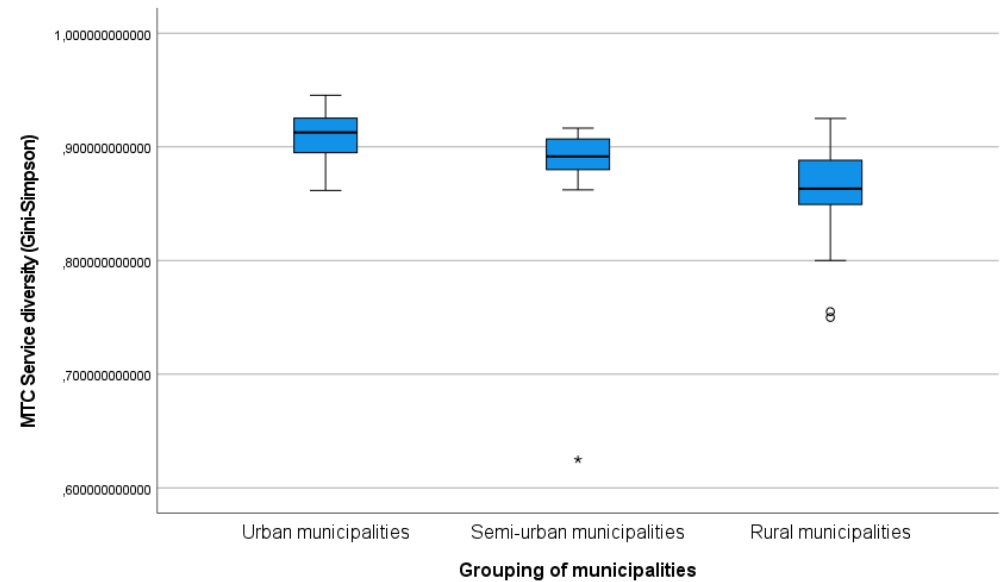

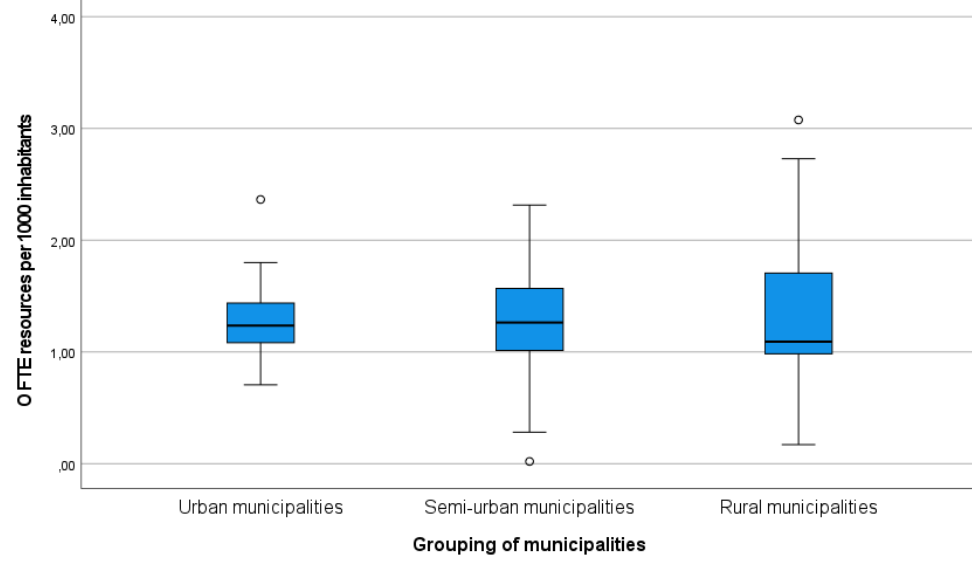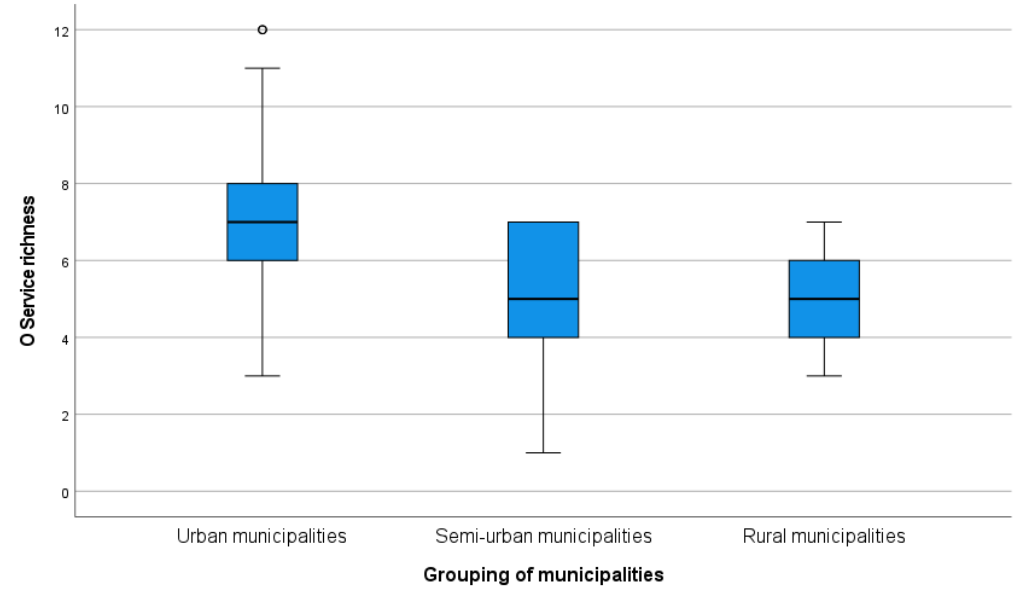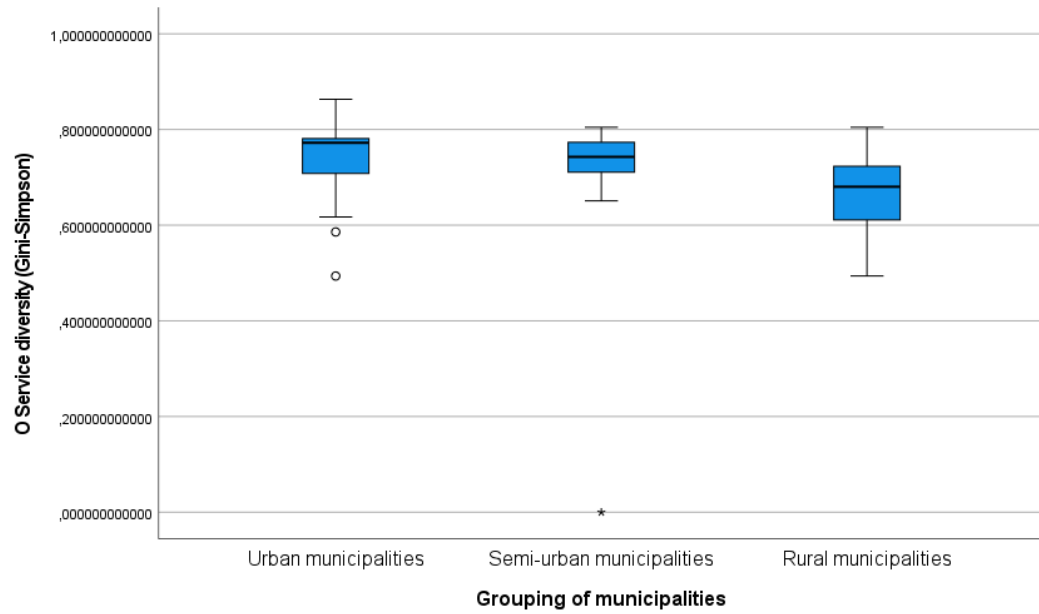

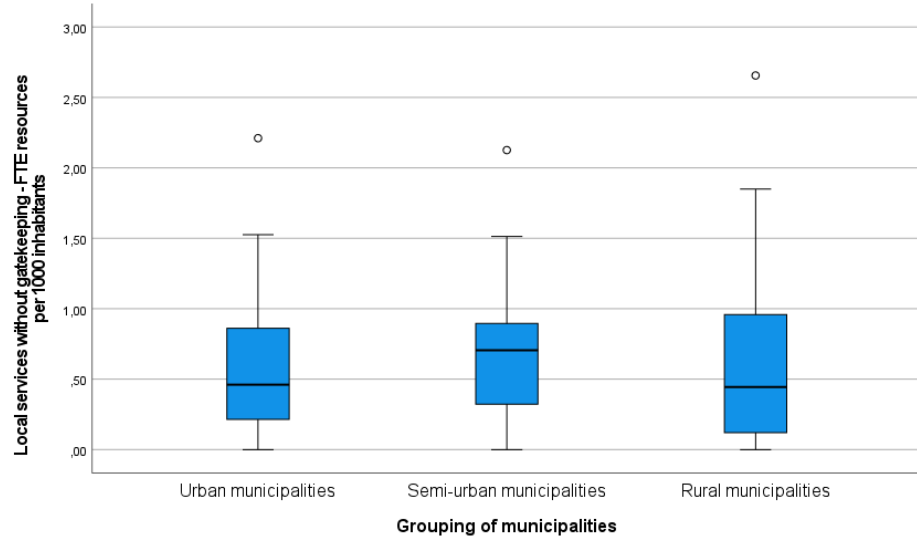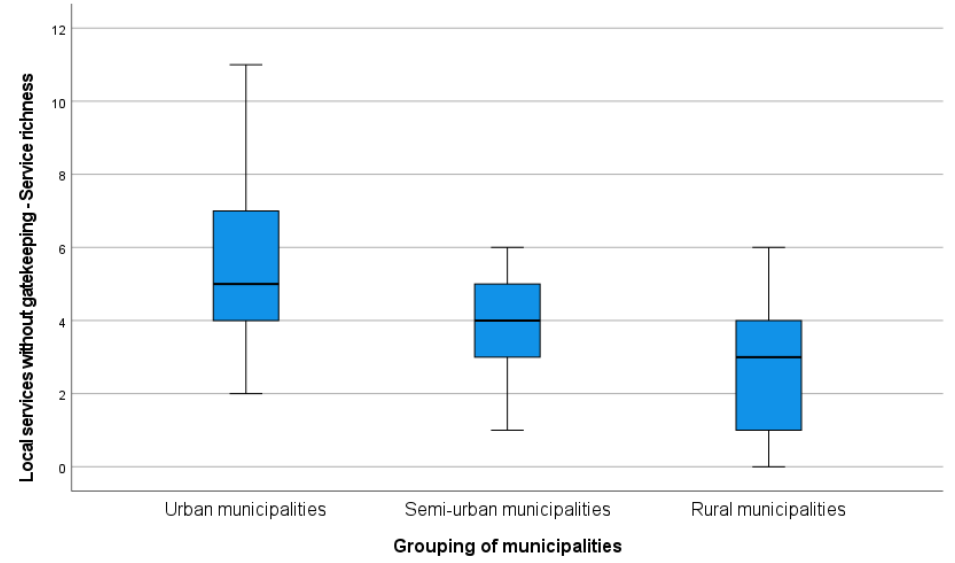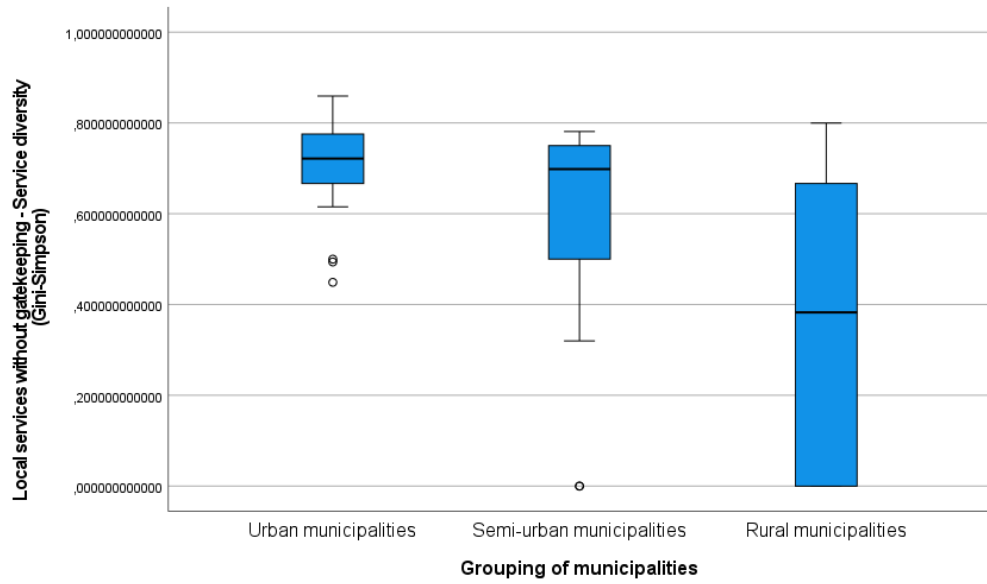

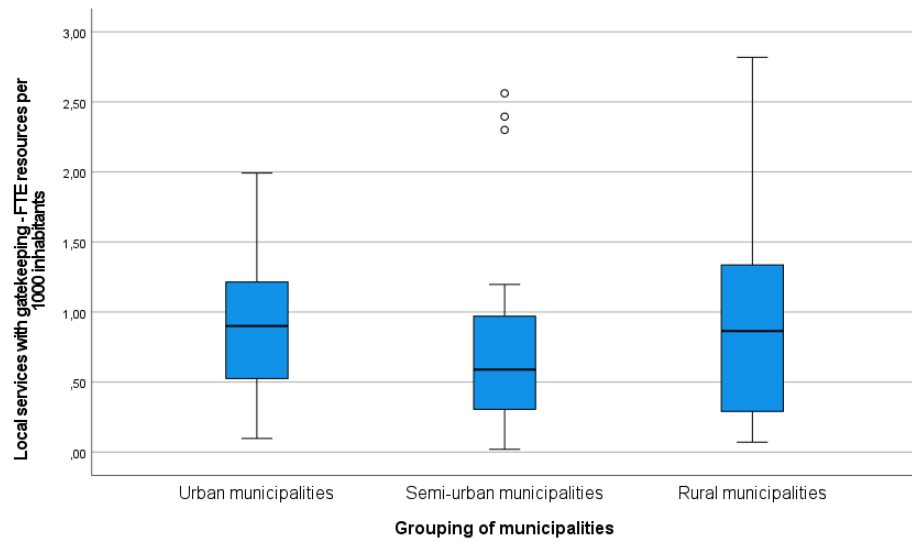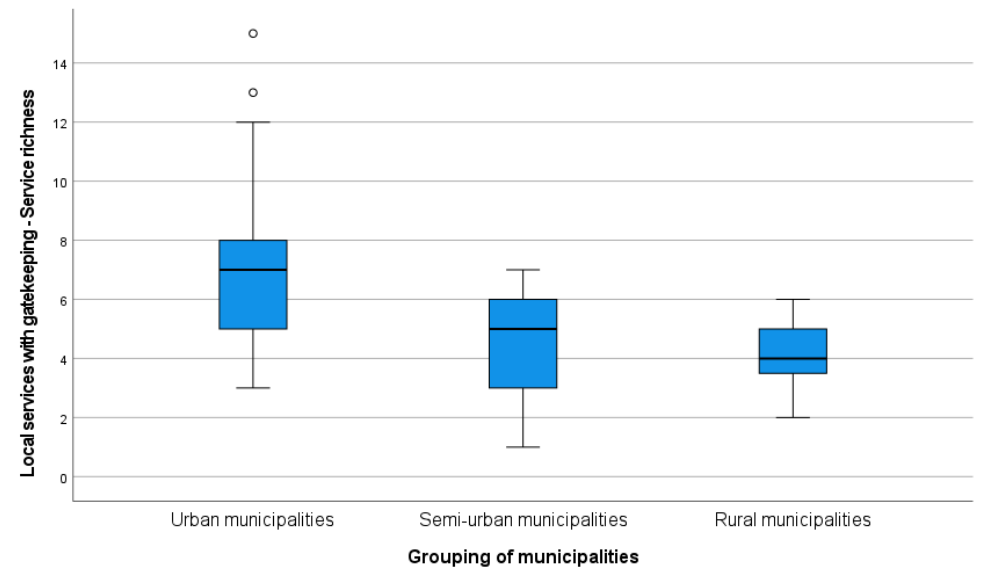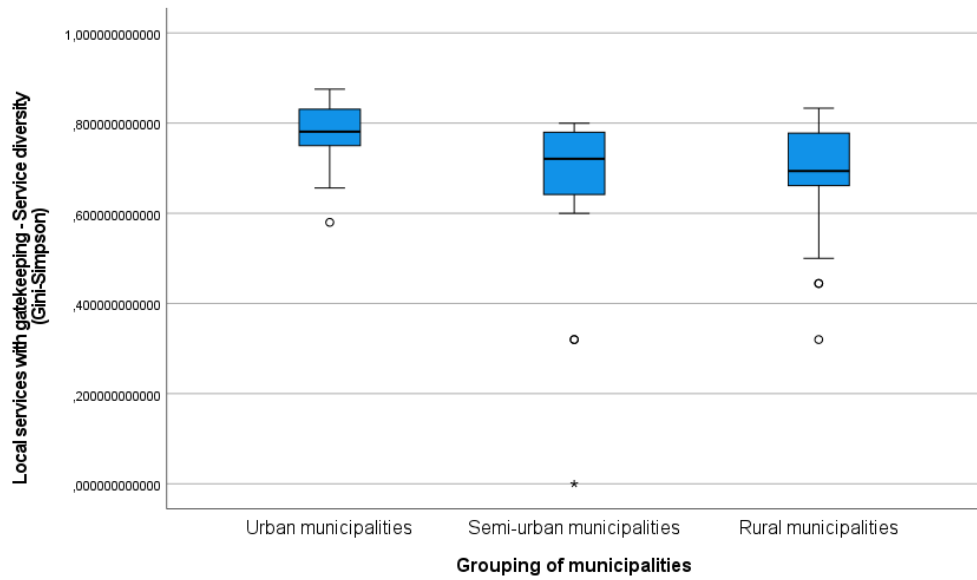

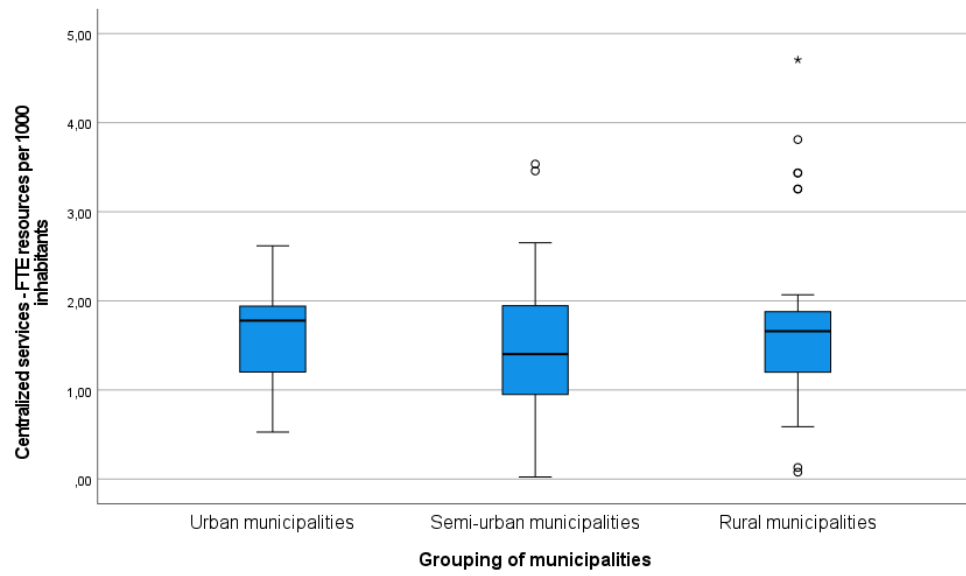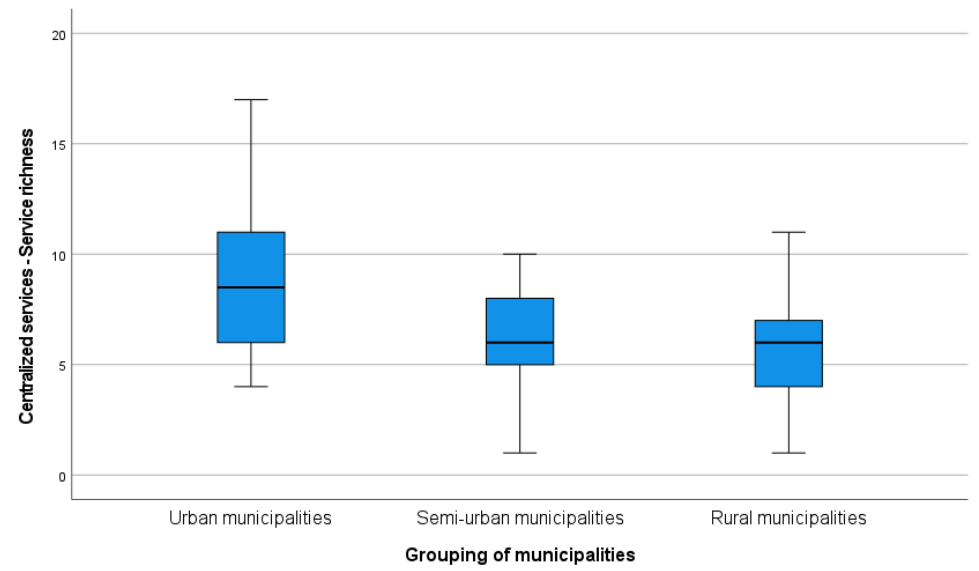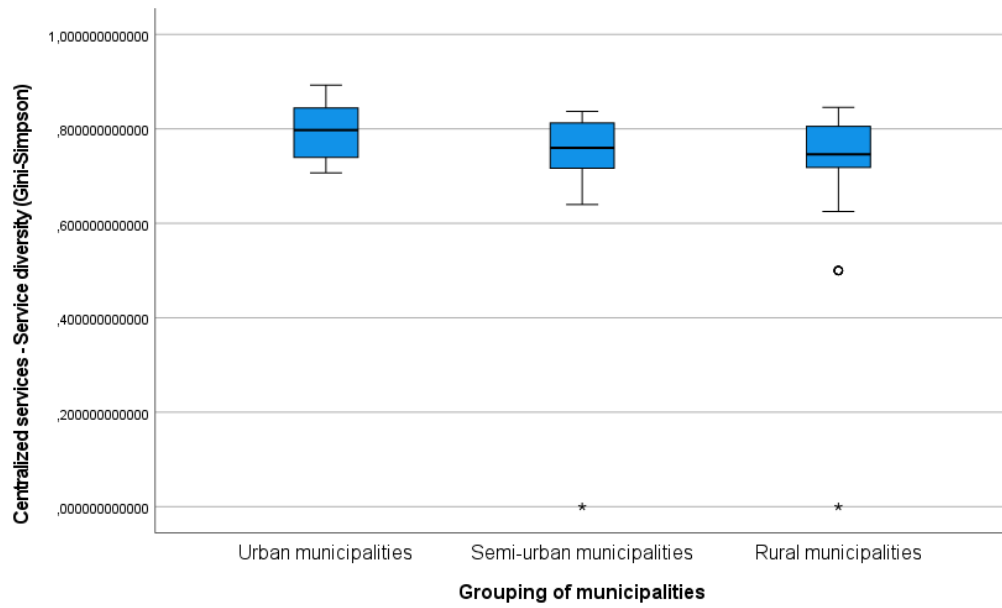

Supplement: MOESM4 [file 25294934]
