# Supplementary material for: Mental health service diversity and work disability: associations of mental health service system characteristics and mood disorder disability pensioning in Finland
Source: Springer Nature journal article supplement (doi:10.1007/s00127-023-02481-5), 2023-04-28

Online Resource 1. ESMS-R classification mapping tree. Includes the Local Service variable: A = local services without gatekeeping, B = local services with gatekeeping, C = centralized services.

Author information: Mental health service diversity and work disability: associations of mental health service system characteristics and mood disorder disability pensioning in Finland. (2023). Social Psychiatry and Psychiatric Epidemiology. Tino Karolaakso [Faculty of Social Sciences (Psychology), Tampere University, Arvo Ylpön katu, 34, 33520 Tampere, Finland; [tino.karolaakso@tuni.fi](mailto:tino.karolaakso@tuni.fi)], Reija Autio, Petra Suontausta. Helena Leppänen, Päivi Rissanen, Turkka Näppilä, Martti T. Tuomisto, Sami Pirkola.

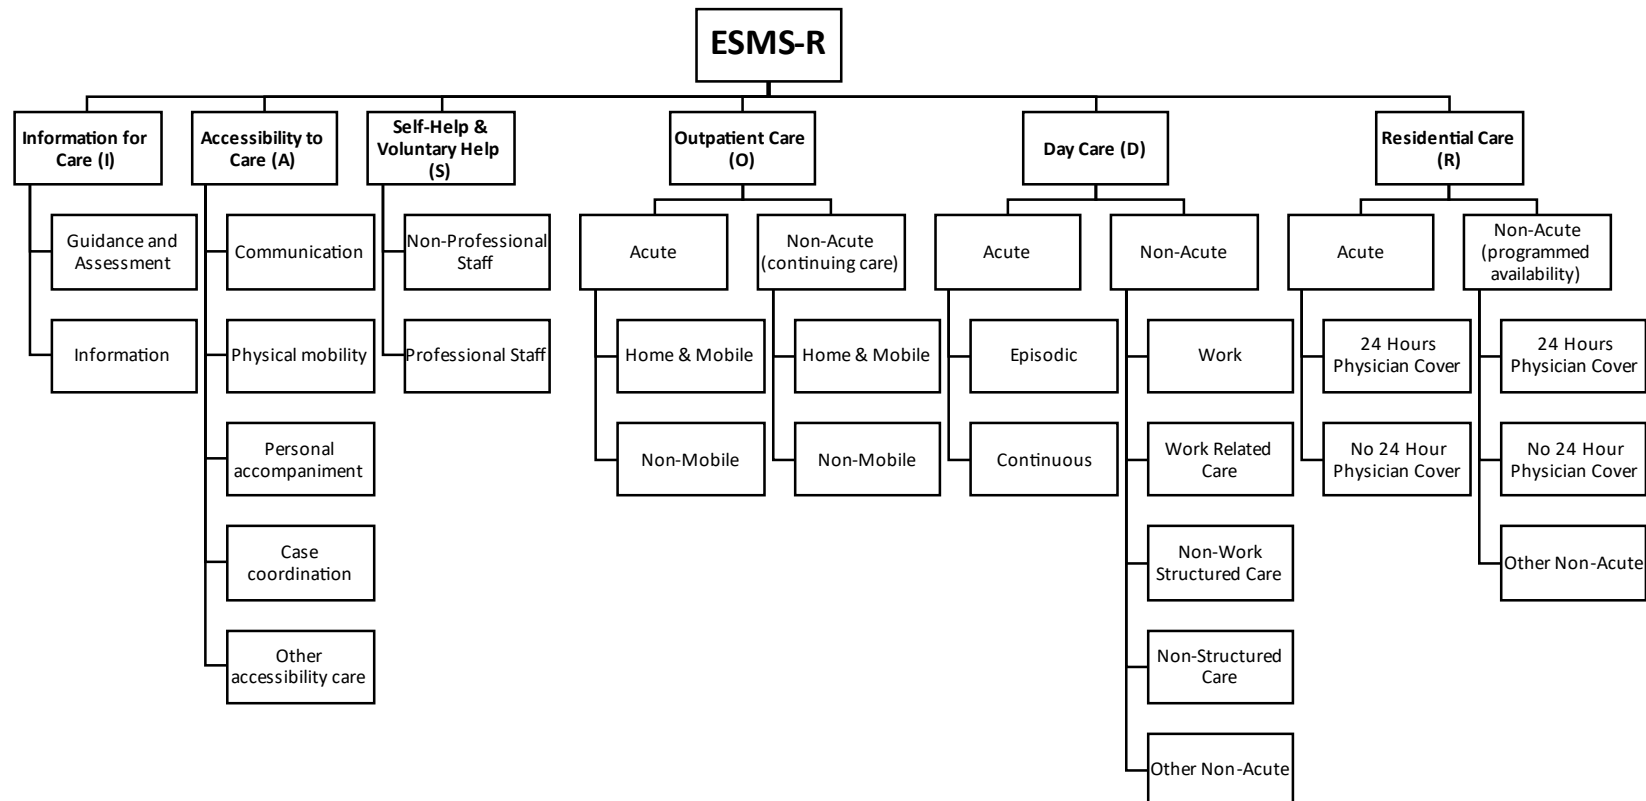

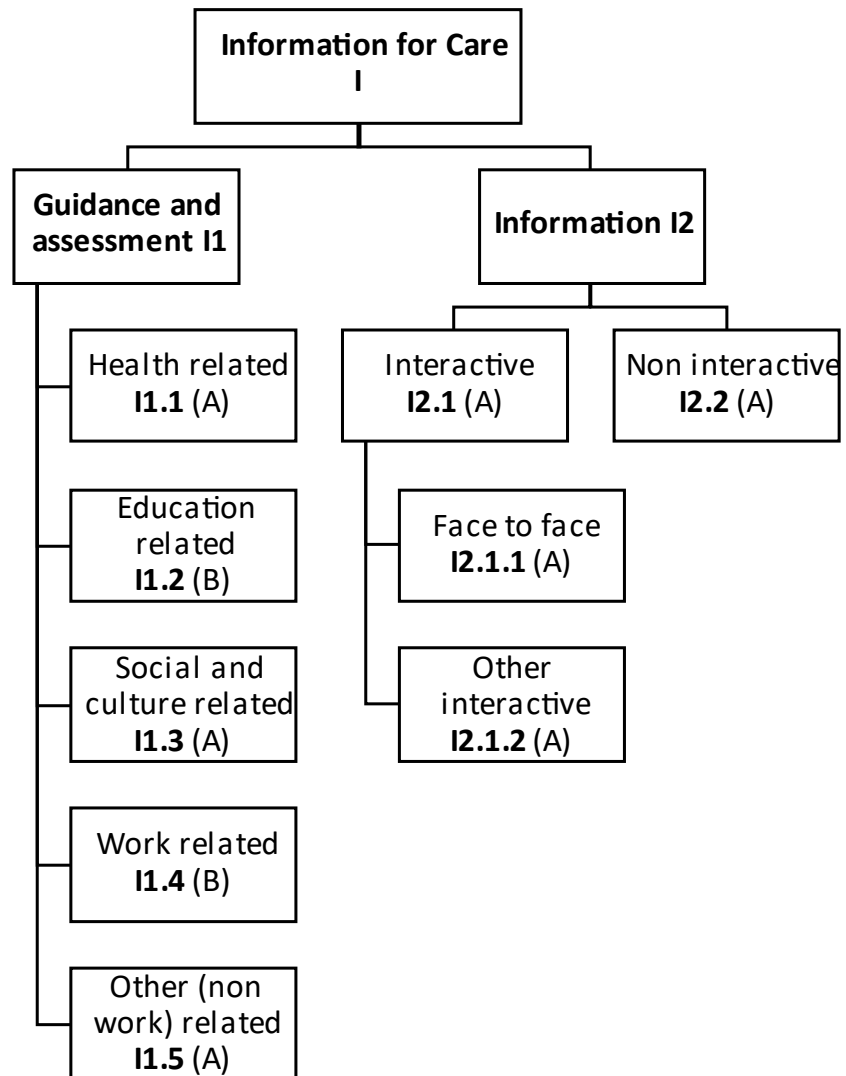

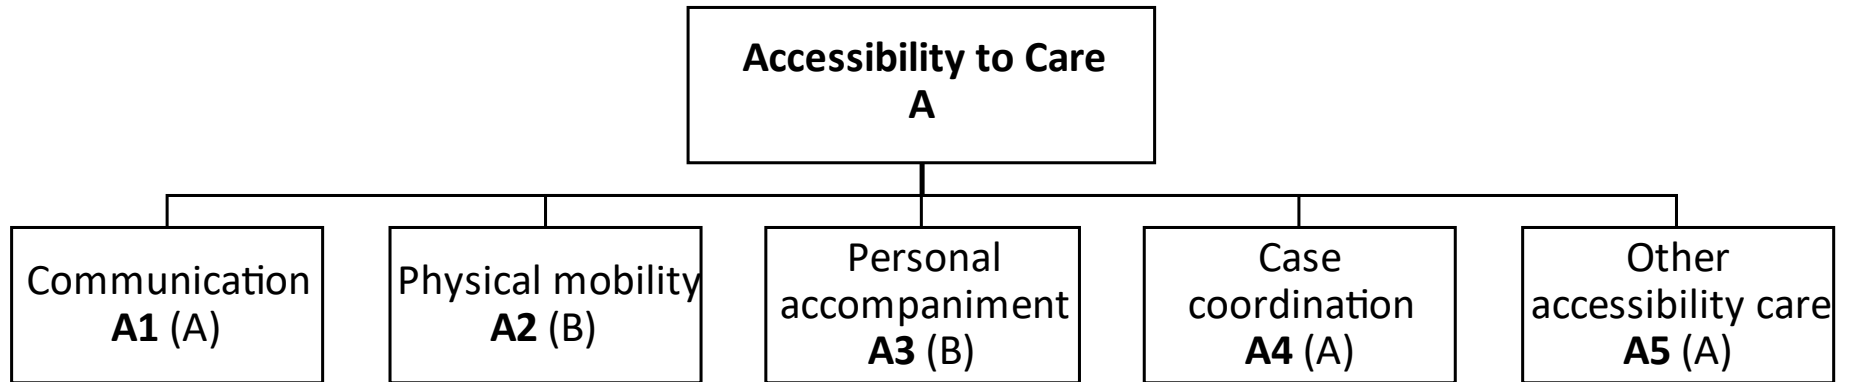

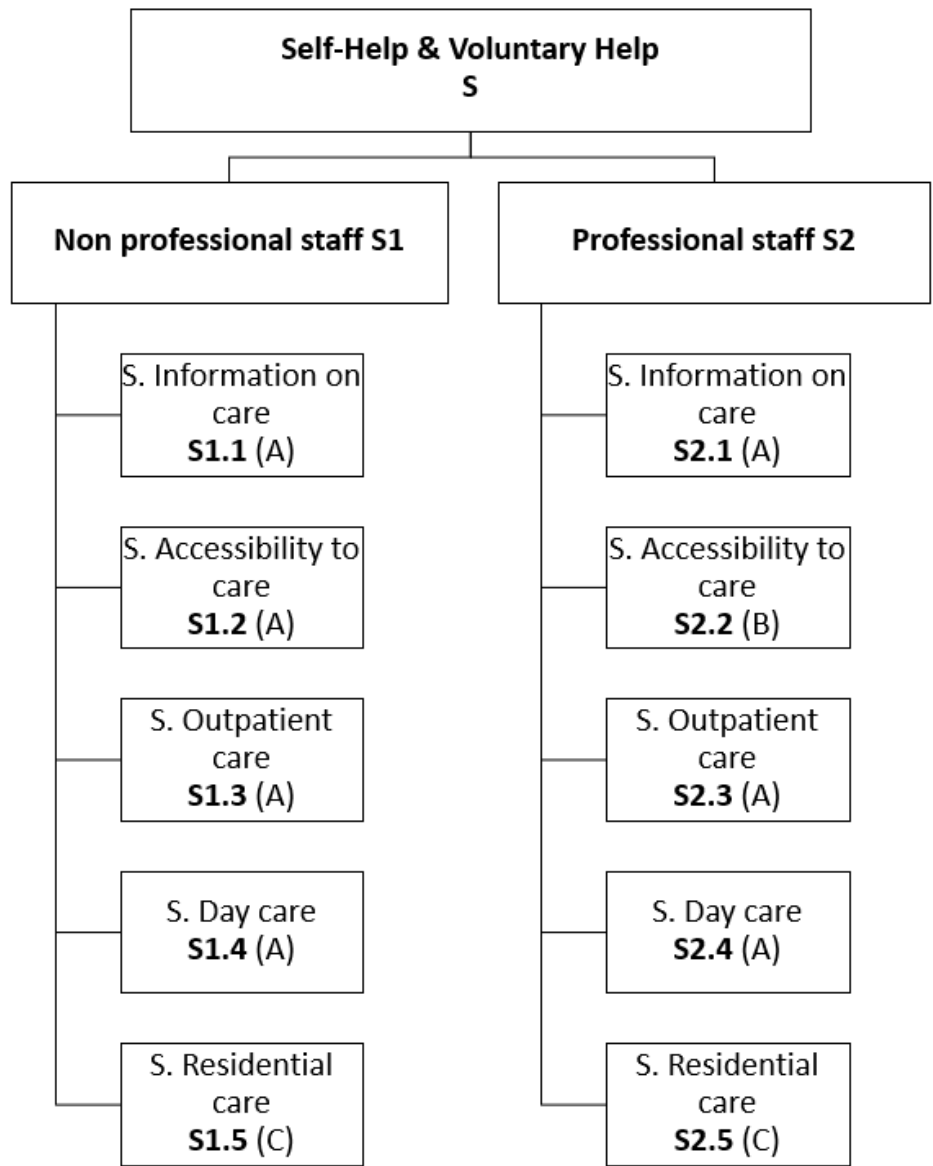

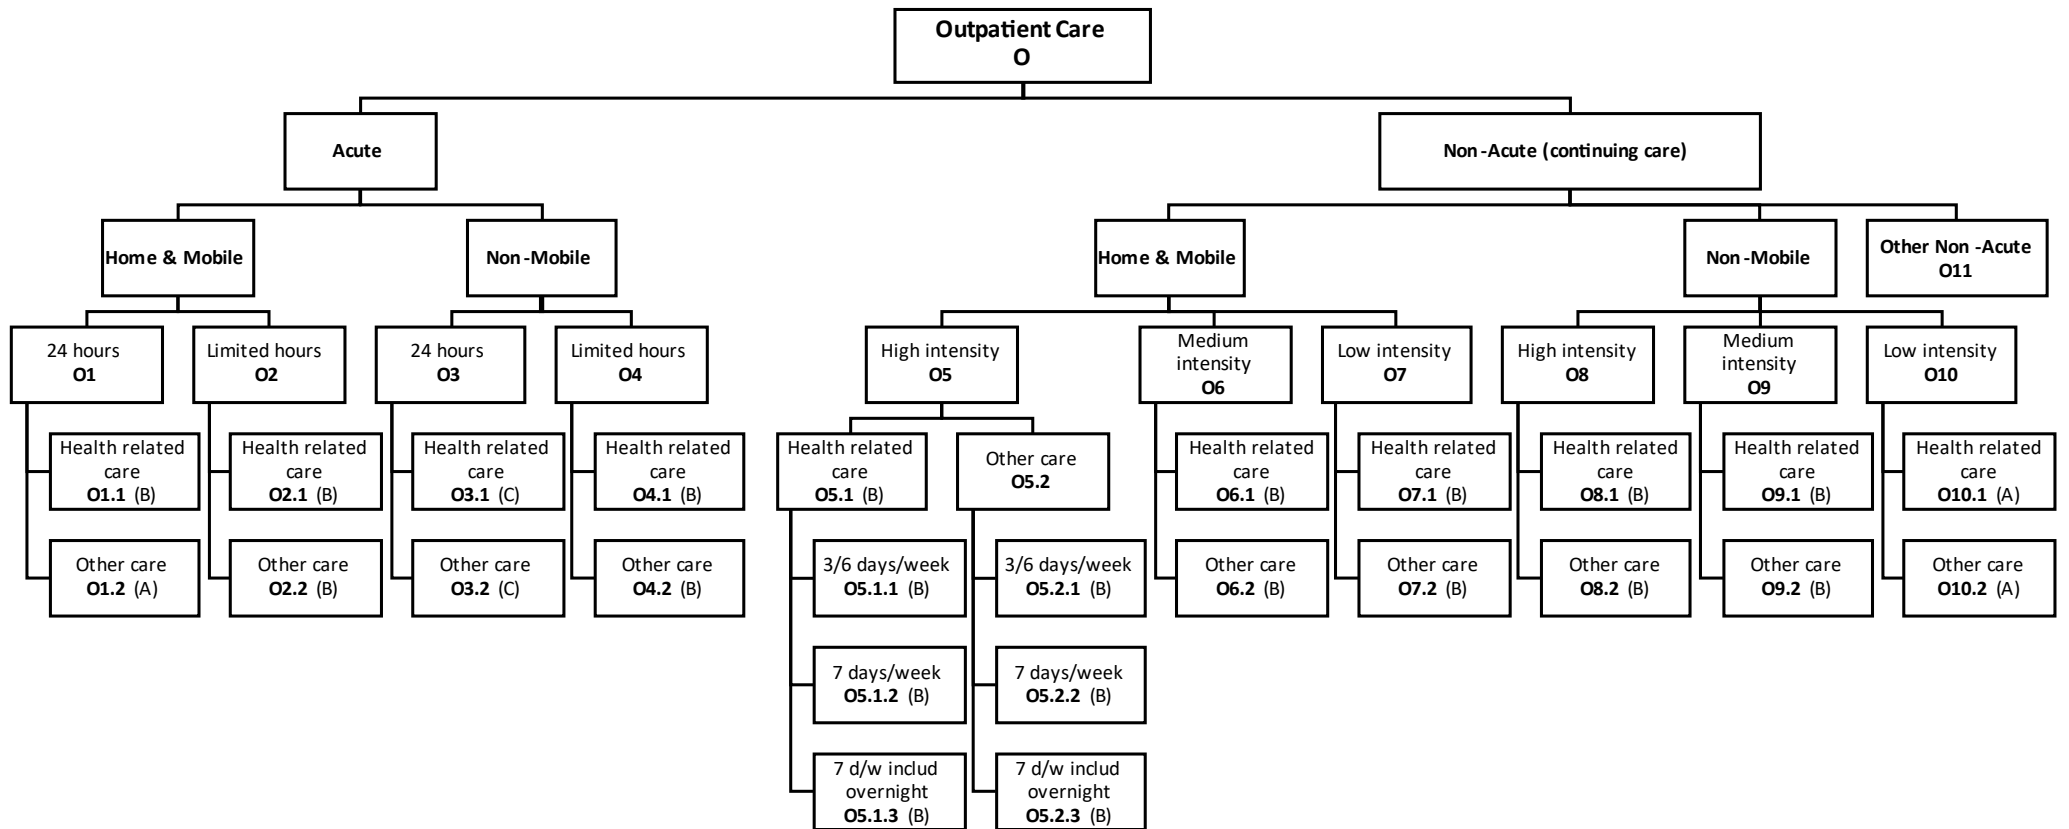

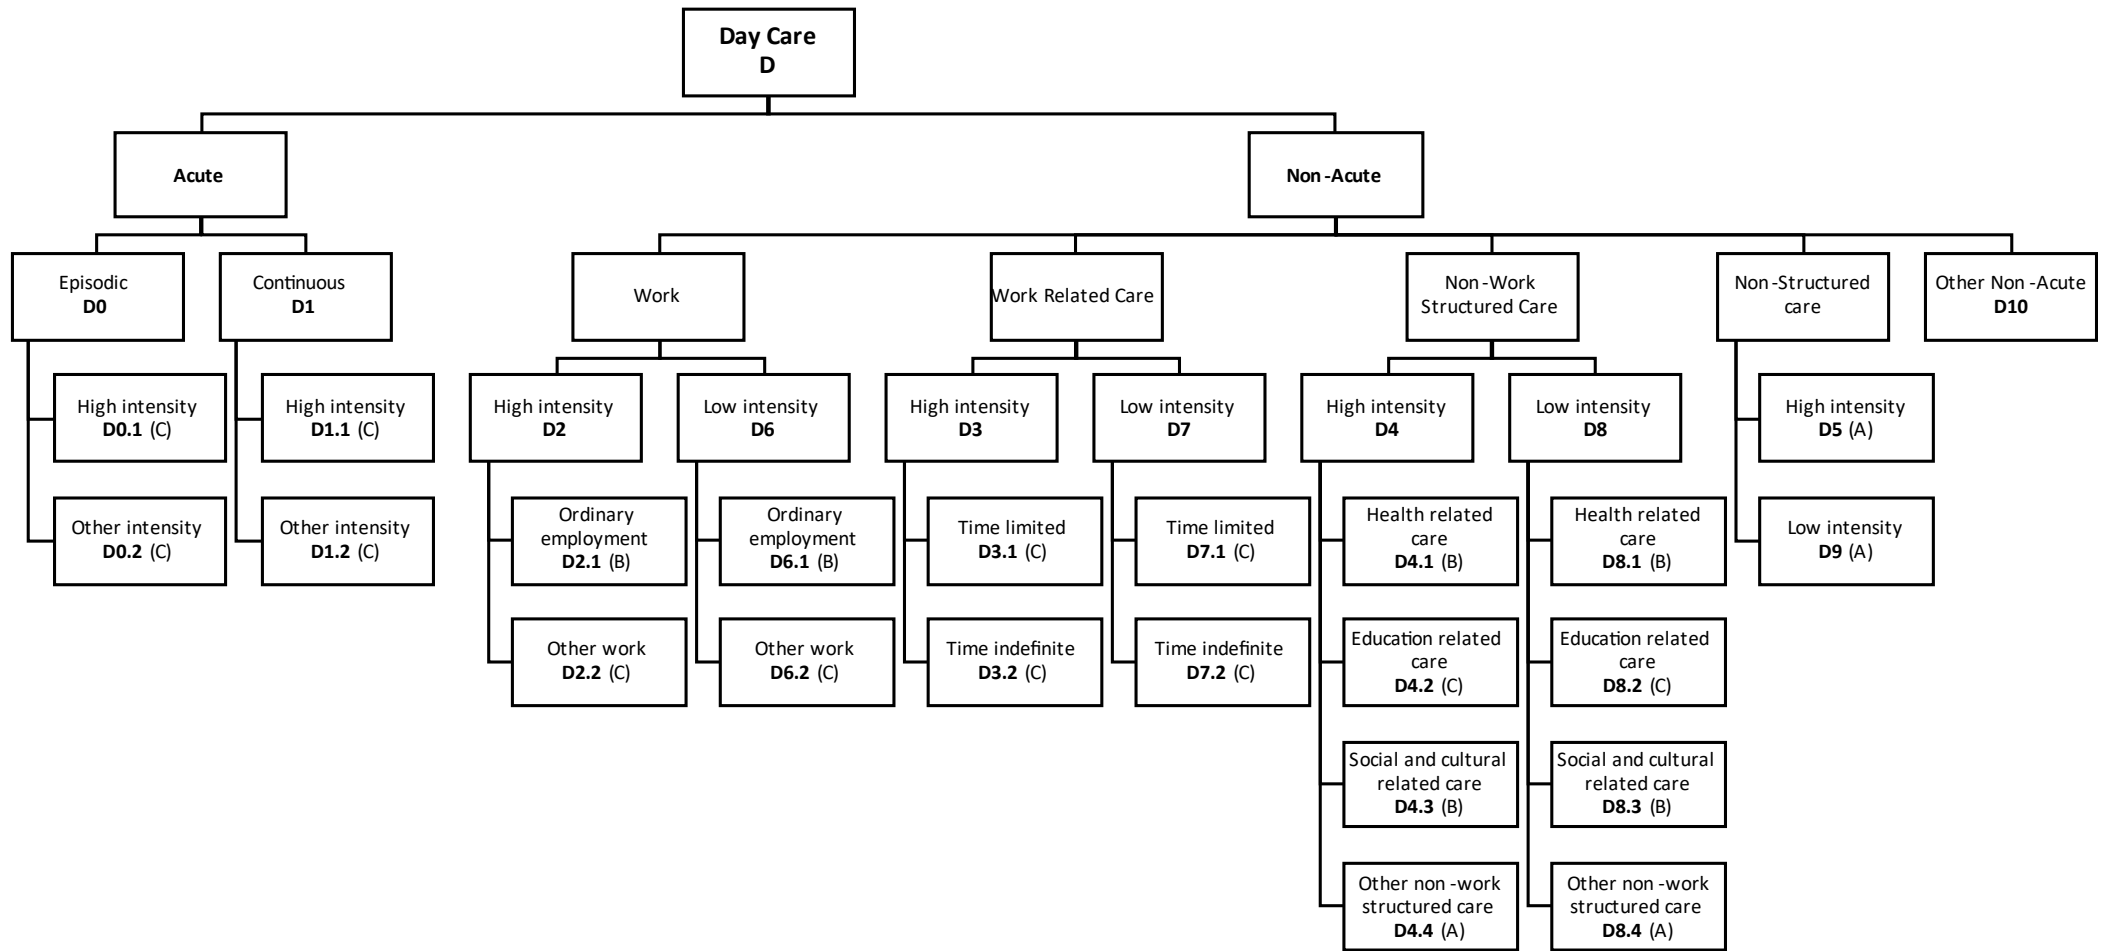

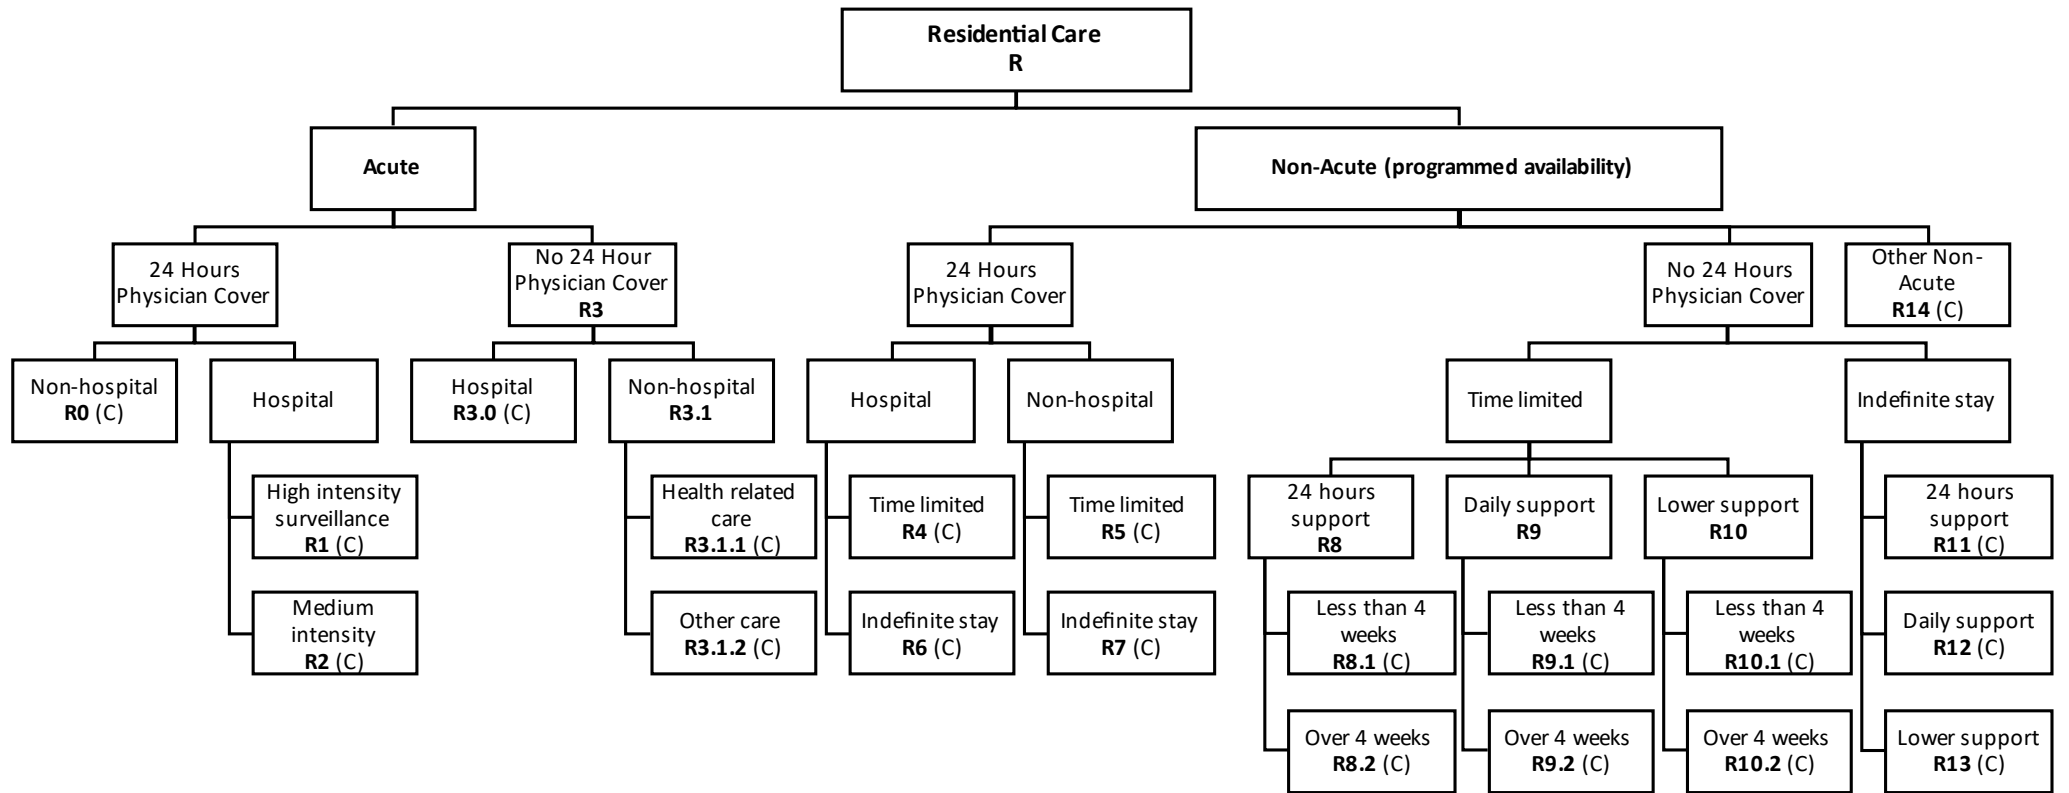

Supplement: MOESM1 [file 25294934]
